# Supplementary material for: Investigation of the Release Rate of Biocide and Corrosion Resistance of Vinyl-, Acrylic-, and Epoxy-Based Antifouling Paints on Steel in Marine Infrastructures
Source: MDPI journal article supplement (doi:10.3390/polym15193948), 2023-09-29
Supplement: s1 [file s1]

# **Investigation of the release rate of biocide and corrosion resistance of vinyl-, acrylic-, and epoxy-based antifouling paints on steel in marine infrastructures**

Adel Jalaie<sup>a</sup>, Abdolah Afshaar<sup>a\*</sup>, Seyed Borhan Mousavi<sup>b\*\*</sup>, Mohammad Heidari<sup>c</sup>

<sup>a</sup> Department of Materials Science and Engineering, Sharif University of Technology, Tehran, Iran

<sup>b</sup> J. Mike Walker '66 Mechanical Engineering Department, Texas A&M University, College Station,  
TX 77843, USA

<sup>c</sup> Faculty of Chemical & Petroleum Engineering, University of Tabriz, Tabriz, Iran

\*Corresponding 1 email: [abdolahafshaar@gmail.com](mailto:abdolahafshaar@gmail.com)

\*\*Corresponding 2 emails: [seyedborhanm@gmail.com](mailto:seyedborhanm@gmail.com), [borhanm@tamu.edu](mailto:borhanm@tamu.edu)

**Table S1** Specification of artificial seawater.

| Material                             | Concentration (gr/liter) |
|--------------------------------------|--------------------------|
| NaCl                                 | 24.53                    |
| MgCl <sub>2</sub> .6H <sub>2</sub> O | 5.20                     |
| Na <sub>2</sub> SO <sub>4</sub>      | 4.09                     |
| CaCl <sub>2</sub>                    | 1.16                     |
| KCl                                  | 0.695                    |
| NaHCO <sub>3</sub>                   | 0.201                    |
| H <sub>3</sub> BO <sub>3</sub>       | 0.207                    |

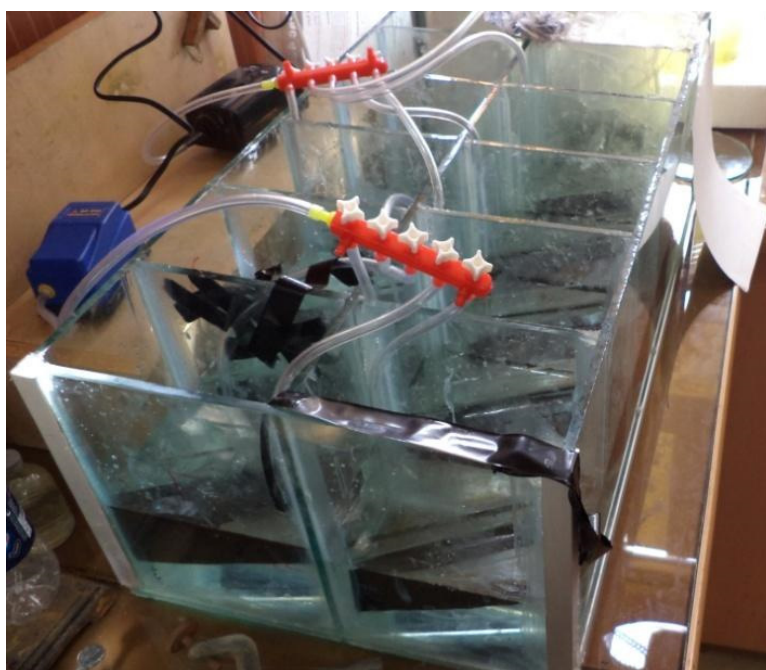

**Figure S1.** Real photo of the designed laboratory system.

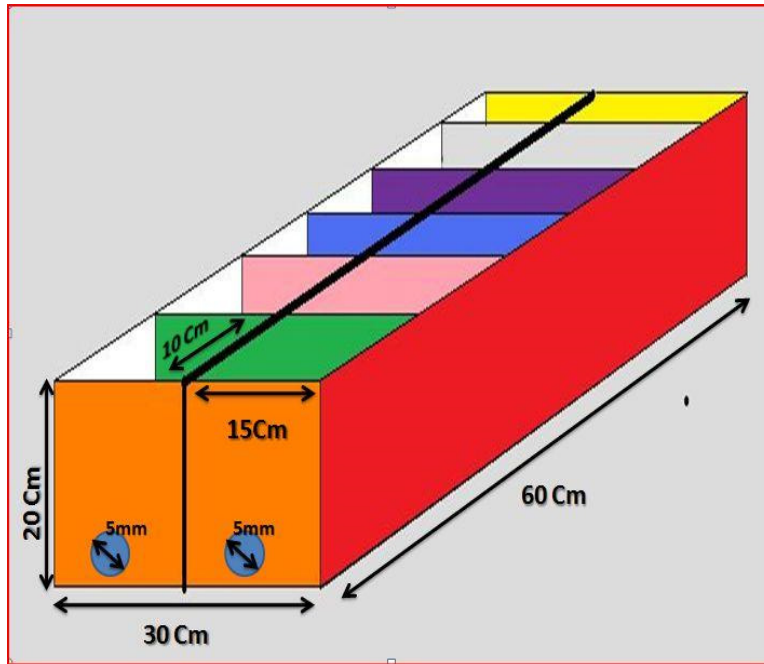

**Figure S2.** Schematic of the designed laboratory system.

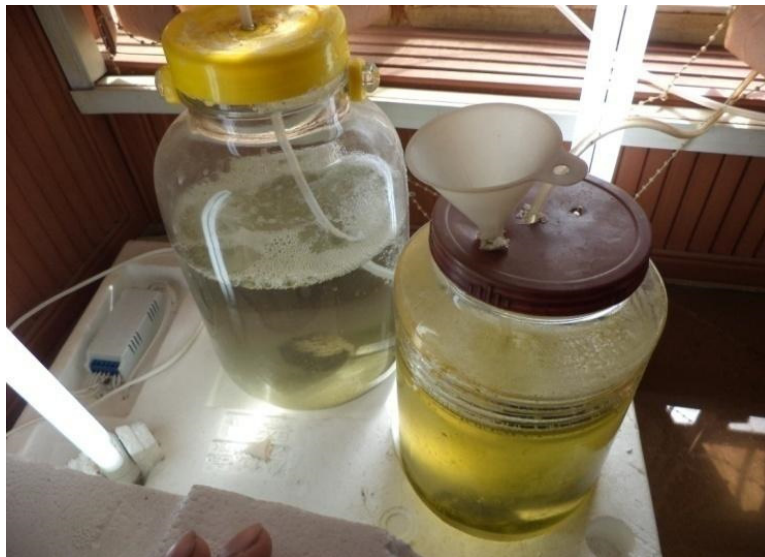

**Figure S3.** Real photo of built setup for algae growth.

**Table S2** Chemical composition of used water in the algae growth environment.

| Material                                             | Concentration (gr/dm <sup>3</sup> ) |
|------------------------------------------------------|-------------------------------------|
| K <sub>2</sub> HPO <sub>4</sub>                      | 2                                   |
| KH <sub>2</sub> PO <sub>4</sub>                      | 3.4                                 |
| MgSO <sub>4</sub> .7H <sub>2</sub> O                 | 2                                   |
| NaNO <sub>3</sub>                                    | 0.6                                 |
| CaCl <sub>2</sub> .2H <sub>2</sub> O                 | 0.6                                 |
| NaCl                                                 | 0.5                                 |
| KOH                                                  | 3                                   |
| FeSO <sub>4</sub> .7H <sub>2</sub> O                 | 0.5                                 |
| H <sub>2</sub> SO <sub>4</sub>                       | 0.184                               |
| H <sub>3</sub> BO <sub>3</sub>                       | 1                                   |
| ZnSO <sub>4</sub> .7H <sub>2</sub> O                 | 0.3                                 |
| MnCl <sub>2</sub> .4H <sub>2</sub> O                 | 0.05                                |
| CuSO <sub>4</sub> .5H <sub>2</sub> O                 | 0.06                                |
| Co(NO <sub>3</sub> ) <sub>2</sub> .6H <sub>2</sub> O | 0.02                                |
| Na <sub>2</sub> MoO <sub>4</sub> .2H <sub>2</sub> O  | 0.04                                |
